# Supplementary material for: Sleep Regularity Index in Patients with Alcohol Dependence: Daytime Napping and Mood Disorders as Correlates of Interest
Source: Int J Environ Res Public Health. 2020 Jan 3;17(1):331. doi: 10.3390/ijerph17010331 (PMC6982308; doi:10.3390/ijerph17010331)
Supplement: Supplementary file 1 [file ijerph-17-00331-s001.pdf]

Table S1. Total number of participants with excluded data within 4 weekly intervals (n = 124).

| <b>Hours Excluded</b> | <b>Number of participants Week 1</b> | <b>Number of participants Week 2</b> | <b>Number of participants Week 3</b> | <b>Number of participants Week 4</b> |
|-----------------------|--------------------------------------|--------------------------------------|--------------------------------------|--------------------------------------|
| 2hrsExcluded          | 10                                   | 24                                   | 15                                   | 37                                   |
| 4hrsExcluded          | 6                                    | 12                                   | 9                                    | 27                                   |
| 6hrsExcluded          | 4                                    | 9                                    | 7                                    | 21                                   |

These counts are not mutually exclusive in that the 6 participants in week 1 with 4 hours excluded might also be counted in week 2 with having 4 hours of excluded data as well. Week 4 data were not used for weekly analyses.

## Irregular Sleepers

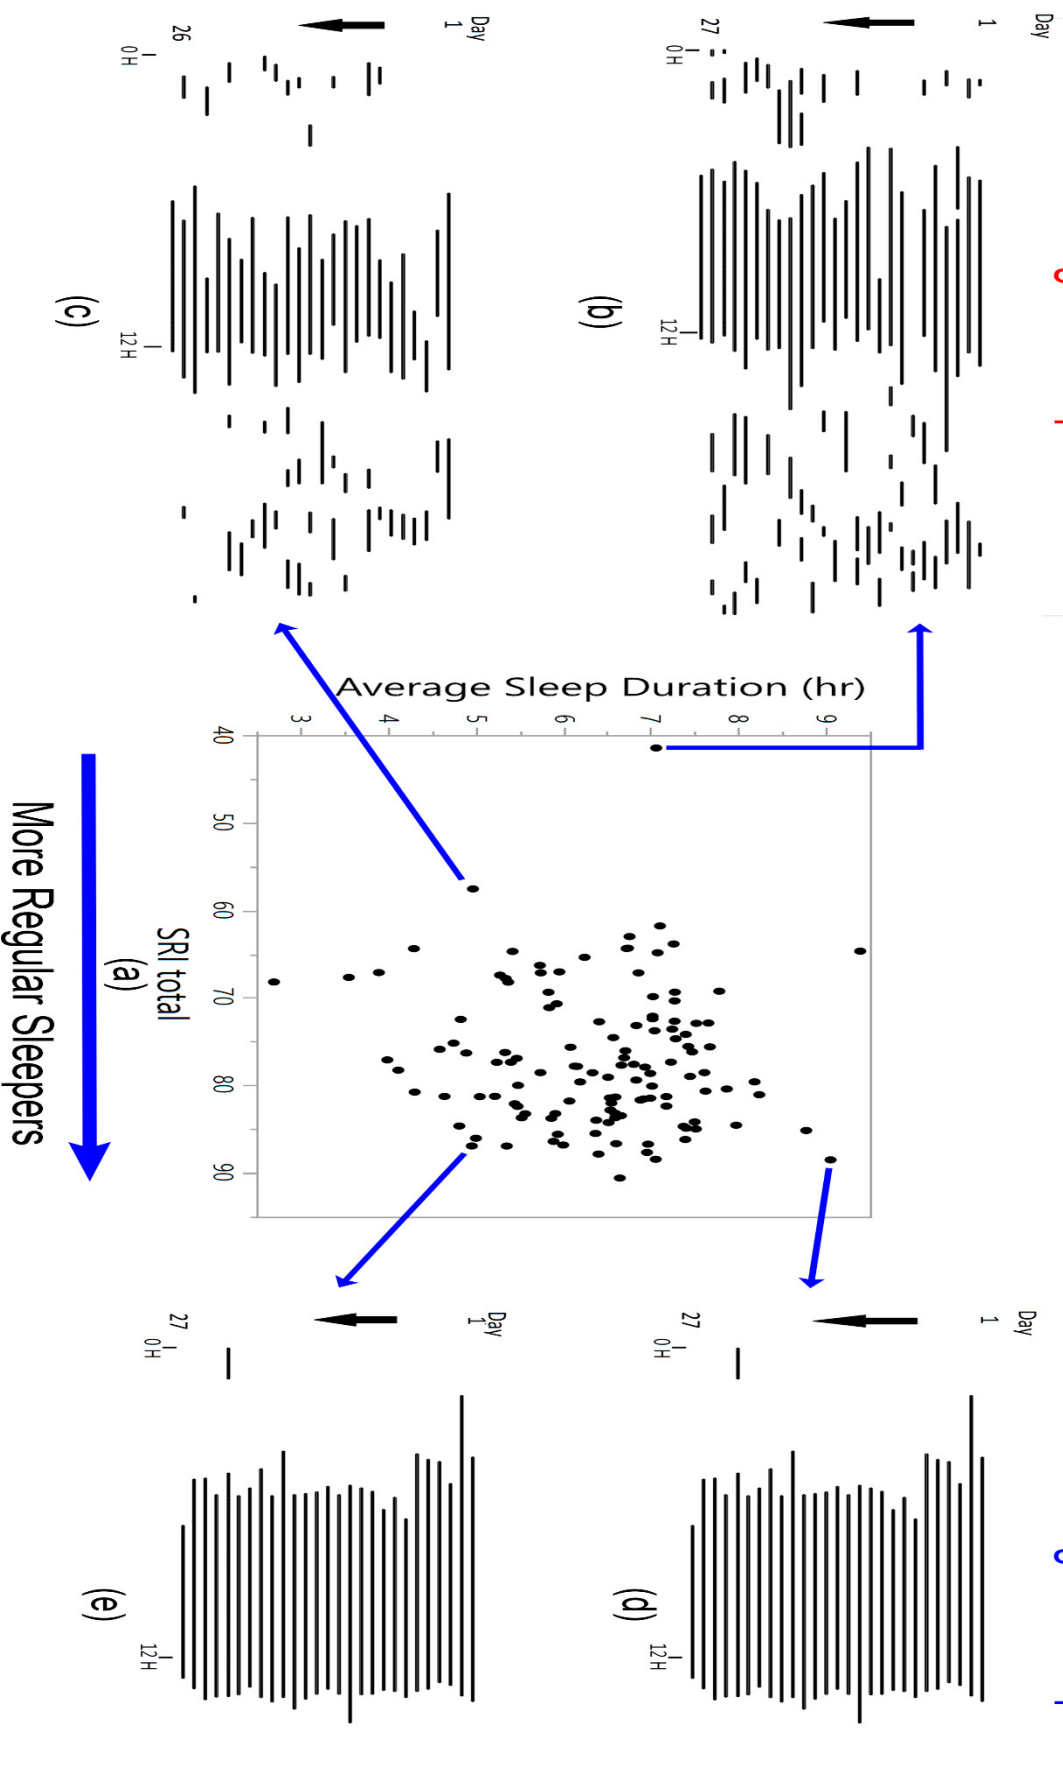

**Figure S1.** Average sleep duration vs. SRI (N= 124). (a) Average sleep duration (y axis) by total SRI (x axis). Plots on either side show a schematic line plot for four individuals noted by arrows from the center plot: (b) & (c) show the sleeping patterns from two irregular sleepers (SRI: 41.46 and 57.56) but with high and low sleeping durations for 27 days (x axis) and the daily 24 hour time intervals (y axis); (d) & (e) show the sleeping patterns from two highly regular sleepers (SRI: 88.51 and 86.93) but with high and low sleeping durations for 27 days (x axis) and the daily 24 hour time intervals (y axis).
